# Supplementary material for: Growth of bismuth- and antimony-based chalcohalide single crystals by the physical vapor transport method
Source: Royal Society of Chemistry journal article supplement (doi:10.1039/d1ce01602d), 2021-12-23
Supplement: d1ce01602d1.pdf [file d1ce01602d1.pdf]

## SUPPLEMENTARY INFORMATION

### **Growth of bismuth and antimony-based chalcogenide single crystals by physical vapor transport method**

Ruichen Bai,<sup>a</sup> Bao Xiao,<sup>a</sup> Fangpei Li,<sup>a</sup> Xin Liu,<sup>a</sup> Shouzhi Xi,<sup>a</sup> Menghua Zhu,<sup>a</sup> Wanqi Jie,<sup>a</sup> Bin-Bin Zhang,<sup>a</sup> Yadong Xu\*<sup>a</sup>

<sup>a</sup> *State Key Laboratory of Solidification Processing & Key Laboratory of Radiation Detection Materials and Devices, MIT,*

*School of Materials Science and Engineering, Northwestern Polytechnical University, Xi'an Shaanxi 710072, China.*

## 1. Single crystal growth

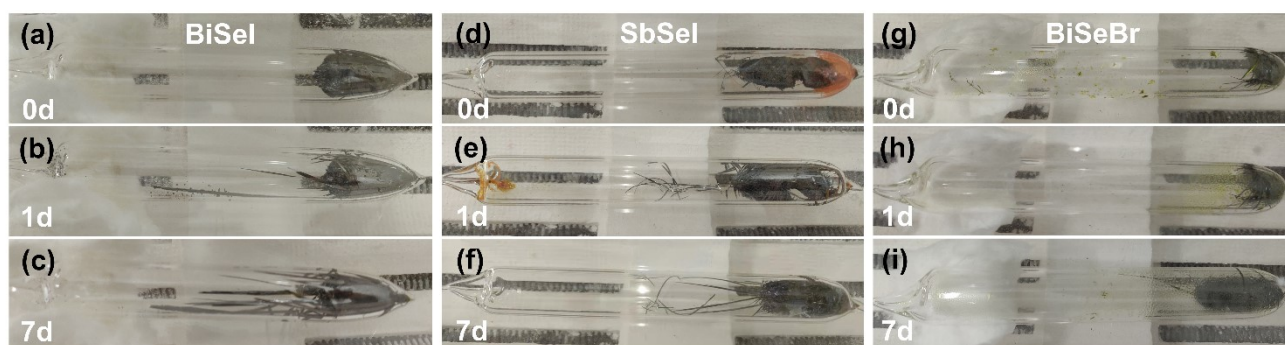

Fig. S1. BiSel in growth process (a) to (c) growth for 0 (as-synthesized), 1 and 7 days, SbSel in growth process (d) to (f) growth for 0 (as-synthesized), 1 and 7 days, BiSeBr in growth process (g) to (i) growth for 0 (as-synthesized), 1 and 7 days.

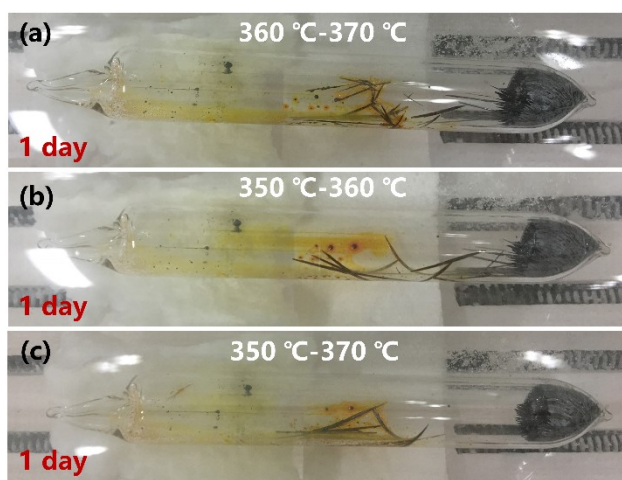

Fig. S2. SbSel single crystals grew in different temperature gradients for 1 day, 350 °C to 370 °C was chosen as optimal temperature gradient.

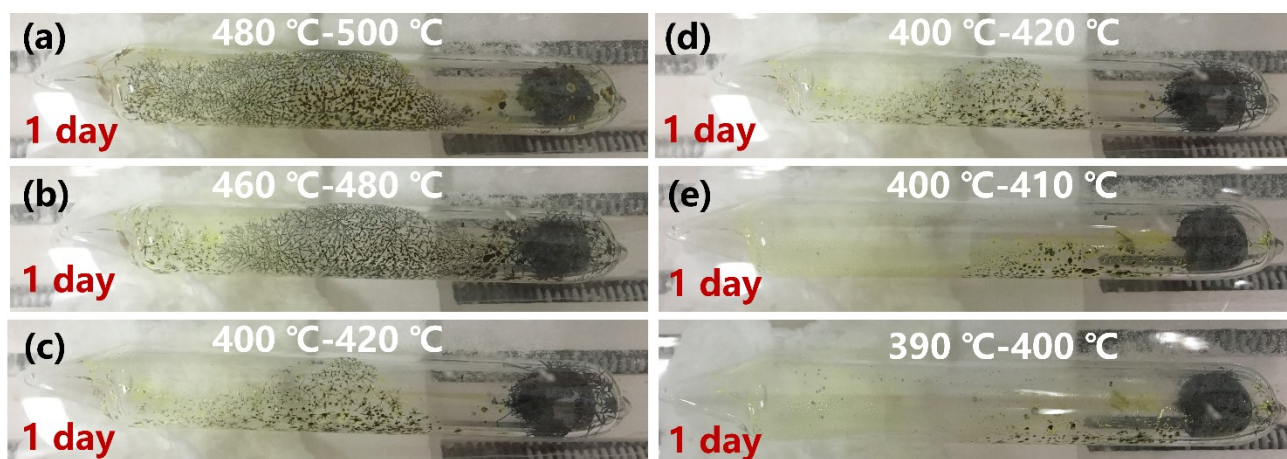

Fig. S3. BiSeBr single crystals grew in different temperature gradients for 1 day, 390 °C to 400 °C was chosen as optimal temperature gradient.

## 2. XRD measurement

Table S1 The lattice constants of BiSeI, SbSeI and BiSeBr.

|        | Lattice constants ( $\text{\AA}$ ) |        |         | $R_{\text{wp}}$ (%) | $R_p$ (%) |
|--------|------------------------------------|--------|---------|---------------------|-----------|
|        | a                                  | b      | c       |                     |           |
| BiSeI  | 8.7074                             | 4.2202 | 10.5837 | 15.24               | 11.70     |
| SbSeI  | 8.7080                             | 4.1314 | 10.4223 | 17.86               | 13.47     |
| BiSeBr | 8.2138                             | 4.1081 | 10.4773 | 20.95               | 14.21     |

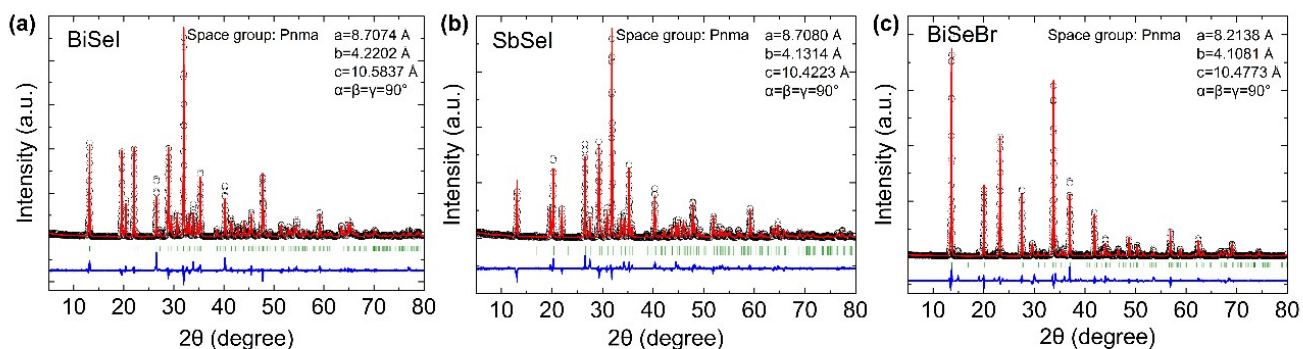

Fig. S4 The Rietveld refinement of the powder XRD data of (a) BiSeI, (b) SbSeI and (c) BiSeBr by GSAS-EXPGUI. Circles are the experimental data and red line is the refinement result. The blue line indicated the difference between the experimental and calculated results. And the expected Bragg peak positions for  $A^{\text{VI}}B^{\text{VI}}C^{\text{VII}}$  phase is shown by the green tick marks.

### 3. SEM results

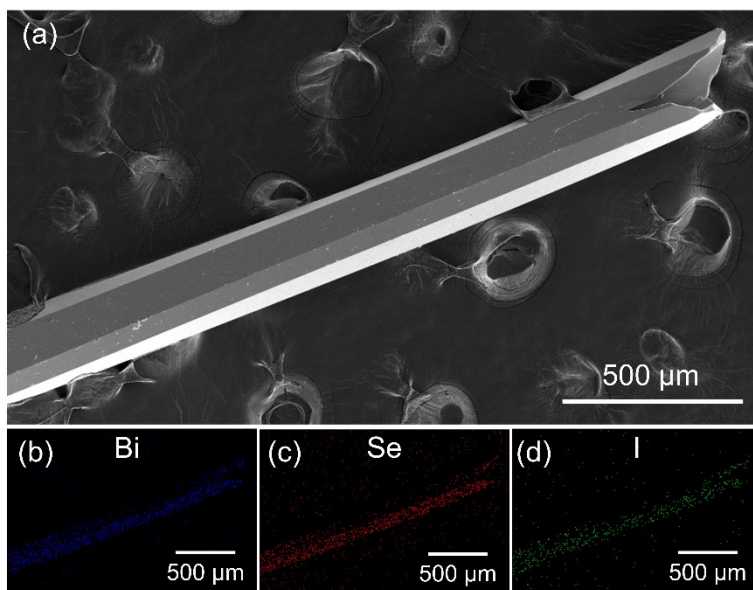

Fig. S5. (a) a typical SEM image of the BiSeI single crystal; (b) to (d) corresponding EDS mapping images of the grown BiSeI crystal.

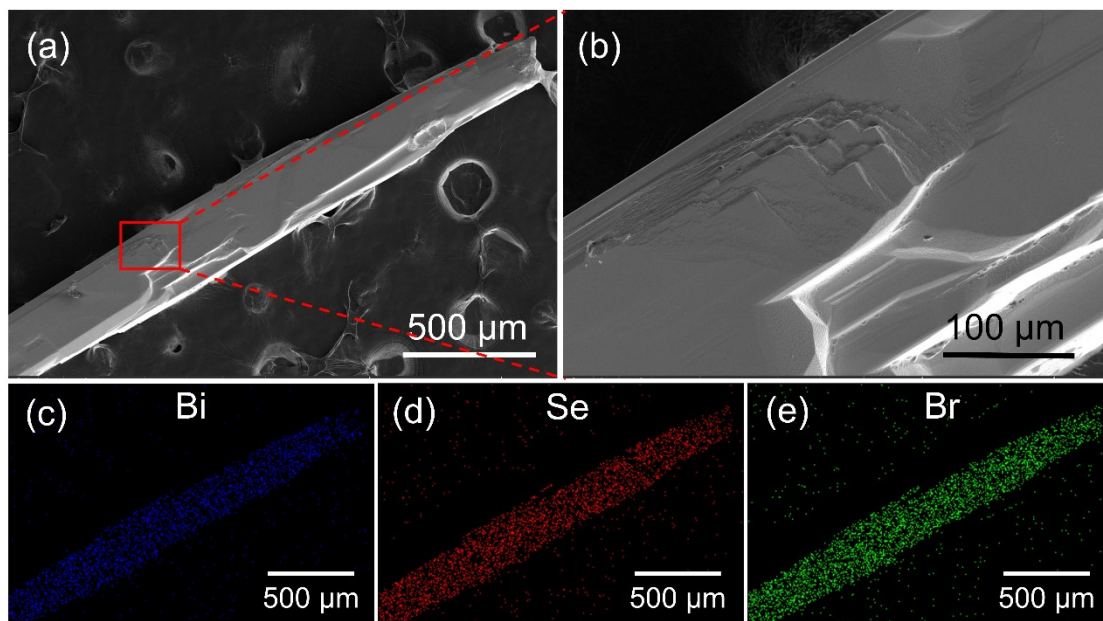

Fig. S6. (a) a typical SEM image of the BiSeBr single crystal and (b) SEM image of the tail of the one-dimensional BiSeBr crystal, (c) to (f) corresponding EDS mapping images of the grown BiSeBr crystal.
